# Supplementary material
Source: HighWire-hosted journal article supplement (https://www.cmaj.ca/highwire/filestream/58186/field_highwire_adjunct_files/3/guide-burns-appendix_4.pdf)
Supplement: guide-burns-appendix_4.pdf [file guide-burns-appendix_4.pdf]

#### Appendix 4: Formulas for estimating the sample size for descriptive survey designs\*

| Design (no. of groups)      | Types of estimate of study variables; formula  |                                                                |
|-----------------------------|------------------------------------------------|----------------------------------------------------------------|
|                             | Means                                          | Proportions                                                    |
| Cross-sectional (1 group)   | $n = \frac{z^2_{1-\alpha/2} \sigma^2}{d^2}$    | $n = \frac{z^2_{1-\alpha/2} P (1-P)}{d^2}$                     |
| Group comparison (2 groups) | $n = \frac{z^2_{1-\alpha/2} [2\sigma^2]}{d^2}$ | $n = \frac{z^2_{1-\alpha/2} [P_1 (1-P_1) + P_2 (1-P_2)]}{d^2}$ |

Note: P = estimated proportion; P<sub>1</sub> = estimated proportion (larger); P<sub>2</sub> = estimated proportion (smaller); d = desired precision; σ = estimated standard deviation; z<sub>1-α/2</sub> = standard errors associated with 2-sided confidence intervals (0.994 [68%], 1.645 [90%], 1.960 [95%], 2.576 [99%]).

\*Adapted, with permission, from Lemeshow S, Hosmer DW Jr, Klar J, et al. *Adequacy of sample size in health studies*. Chichester (UK): John Wiley & Sons; 1990. p. 1,10,36,39.
